# Supplementary material
Source: MDPI journal article supplement (https://www.mdpi.com/2311-5629/9/4/121)
Supplement: s1 [file s1]

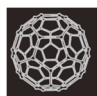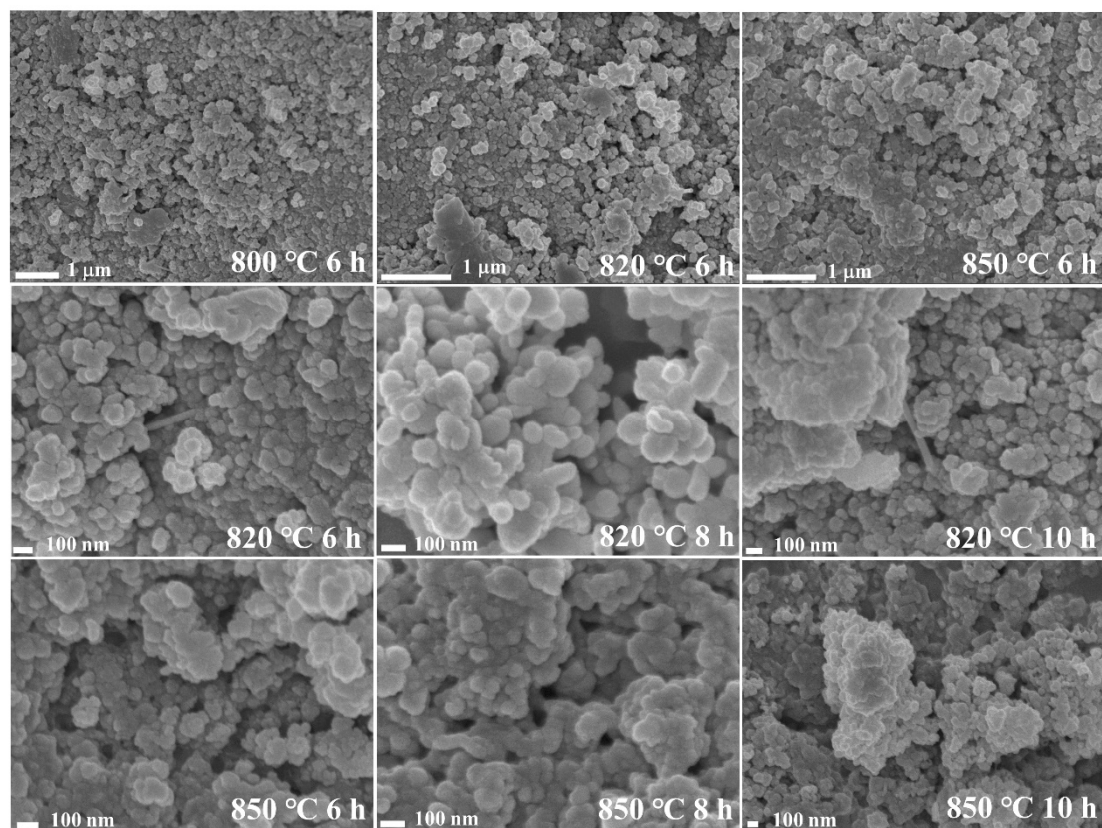

**Figure S1.** SEM of the products prepared by the waste tires pyrolytic carbon in 0.3 mL of H<sub>2</sub>O at different times and temperatures.

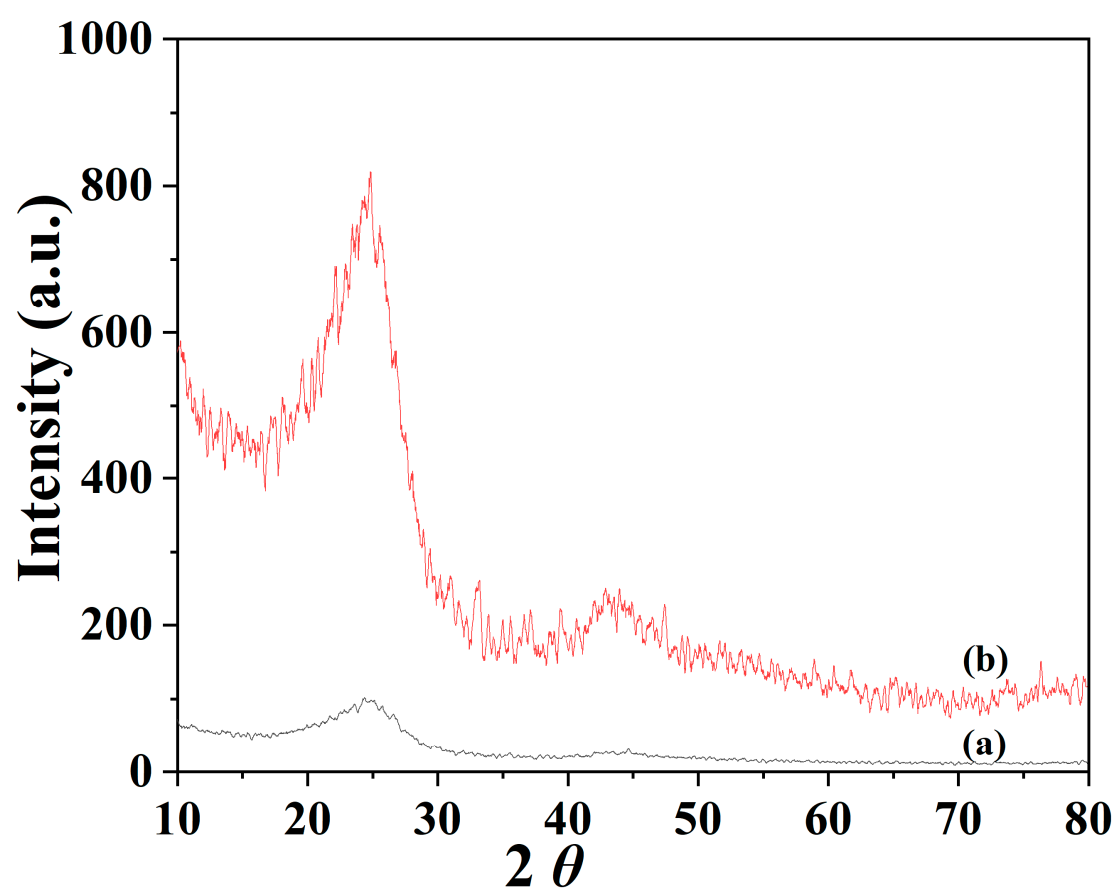

**Figure S2.** XRD of (a) Pt/C and (b) Pt/CNTs.

**Table S1.** Comparison of dehydrogenation of MCH over Pt-based catalysts at 300 °C from the literature.

| Catalysts                           | Rate of liquid MCH (mL/min) | Catalyst weight | Pt loading content (wt %) | Conversion of MCH (%) | H <sub>2</sub> evolution rate (mmol/g <sub>Pt</sub> /min) | Ref.      |
|-------------------------------------|-----------------------------|-----------------|---------------------------|-----------------------|-----------------------------------------------------------|-----------|
| Pt/SBA-15                           | 0.03                        | 0.05            | 3                         | 65 (initial)          | 308.6                                                     | [1]       |
| Pt/Mg-Al-O                          | -                           | -               | 0.2                       | -                     | 145.1                                                     | [2]       |
| Pt/Al <sub>2</sub> O <sub>3</sub>   | -                           | -               | 0.2                       | -                     | 148.7                                                     | [2]       |
| Pt/pyrolytic waste activated carbon | 0.03                        | 0.554           | 0.4                       | 95                    | 305.3                                                     | [3]       |
| PtSn-5/Mg-Al-O-350                  | 0.1                         | 0.5             | 2                         | 90.5                  | 214.8                                                     | [4]       |
| Pt/CNTs                             | 0.03                        | 0.3             | 0.2                       | 28.6                  | 336.9                                                     | This work |

## References

1. Chen, A.; Zhang, W.; Li, X.; Tan, D.; Han, X.; Bao, X. One-pot encapsulation of Pt nanoparticles into the mesochannels of SBA-15 and their catalytic dehydrogenation of methylcyclohexane. *Catal. Lett.* **2007**, *119*, 159–164. <https://doi.org/10.1007/s10562-007-9214-6>.
2. Sugiura, Y.; Nagatsuka, T.; Kubo, K.; Hirano, Y.; Akitoshi, N.; Miyazawa, K.; Iizuka, Y.; Furuta, S. Dehydrogenation of methylcyclohexane over Pt/TiO<sub>2</sub>-Al<sub>2</sub>O<sub>3</sub> catalysts. *Chem Lett* **2017**, *46*, 1601–1604. <https://doi.org/10.1246/cl.170722>
3. Zhang, C.; Liang, X.Q.; Liu, S.X. Hydrogen production by catalytic dehydrogenation of methylcyclohexane over Pt catalysts supported on pyrolytic waste tire char. *Int. J. Hydrogen Energy* **2011**, *36*, 8902–8907. <https://doi.org/10.1016/j.ijhydene.2011.04.175>.
4. Yan, J.; Wang, W.Y.; Miao, L.; Wu, K.; Chen, G. L.; Huang, Y. P.; Yang, Y. Q. Dehydrogenation of methylcyclohexane over Pt-Sn supported on Mg-Al mixed metal oxides derived from layered double hydroxides. *Int J Hydrogen Energy* **2017**, *43*, 9343–9352. <https://doi.org/10.1016/j.ijhydene.2018.04.003>
